# Supplementary material for: Detection of Passive Liver Congestion in Pericarditis Patients With Constrictive Physiology Using MR Relaxometry of the Liver.
Source: Research Square preprint supplement (doi:10.21203/rs.3.rs-114965/v1), 2020-12-04

**Detection of passive liver congestion in pericarditis patients with constrictive physiology using MR Relaxometry of the liver.**

**Jan Bogaert *,1** MD,PhD; **Tom Dresselaers** 1 PhD; **Massimo Imazio 2** MD, PhD; **Peter Sinnaeve 3** MD, PhD; **Luigi Tassetti 1** MD; **Pier Giorgio Masci 4** MD, PhD; **Rolf Symons 1** MD, PhD

**Supplementary Figure 1** Correlation between T1, T2 and ECV values of the liver parenchyma
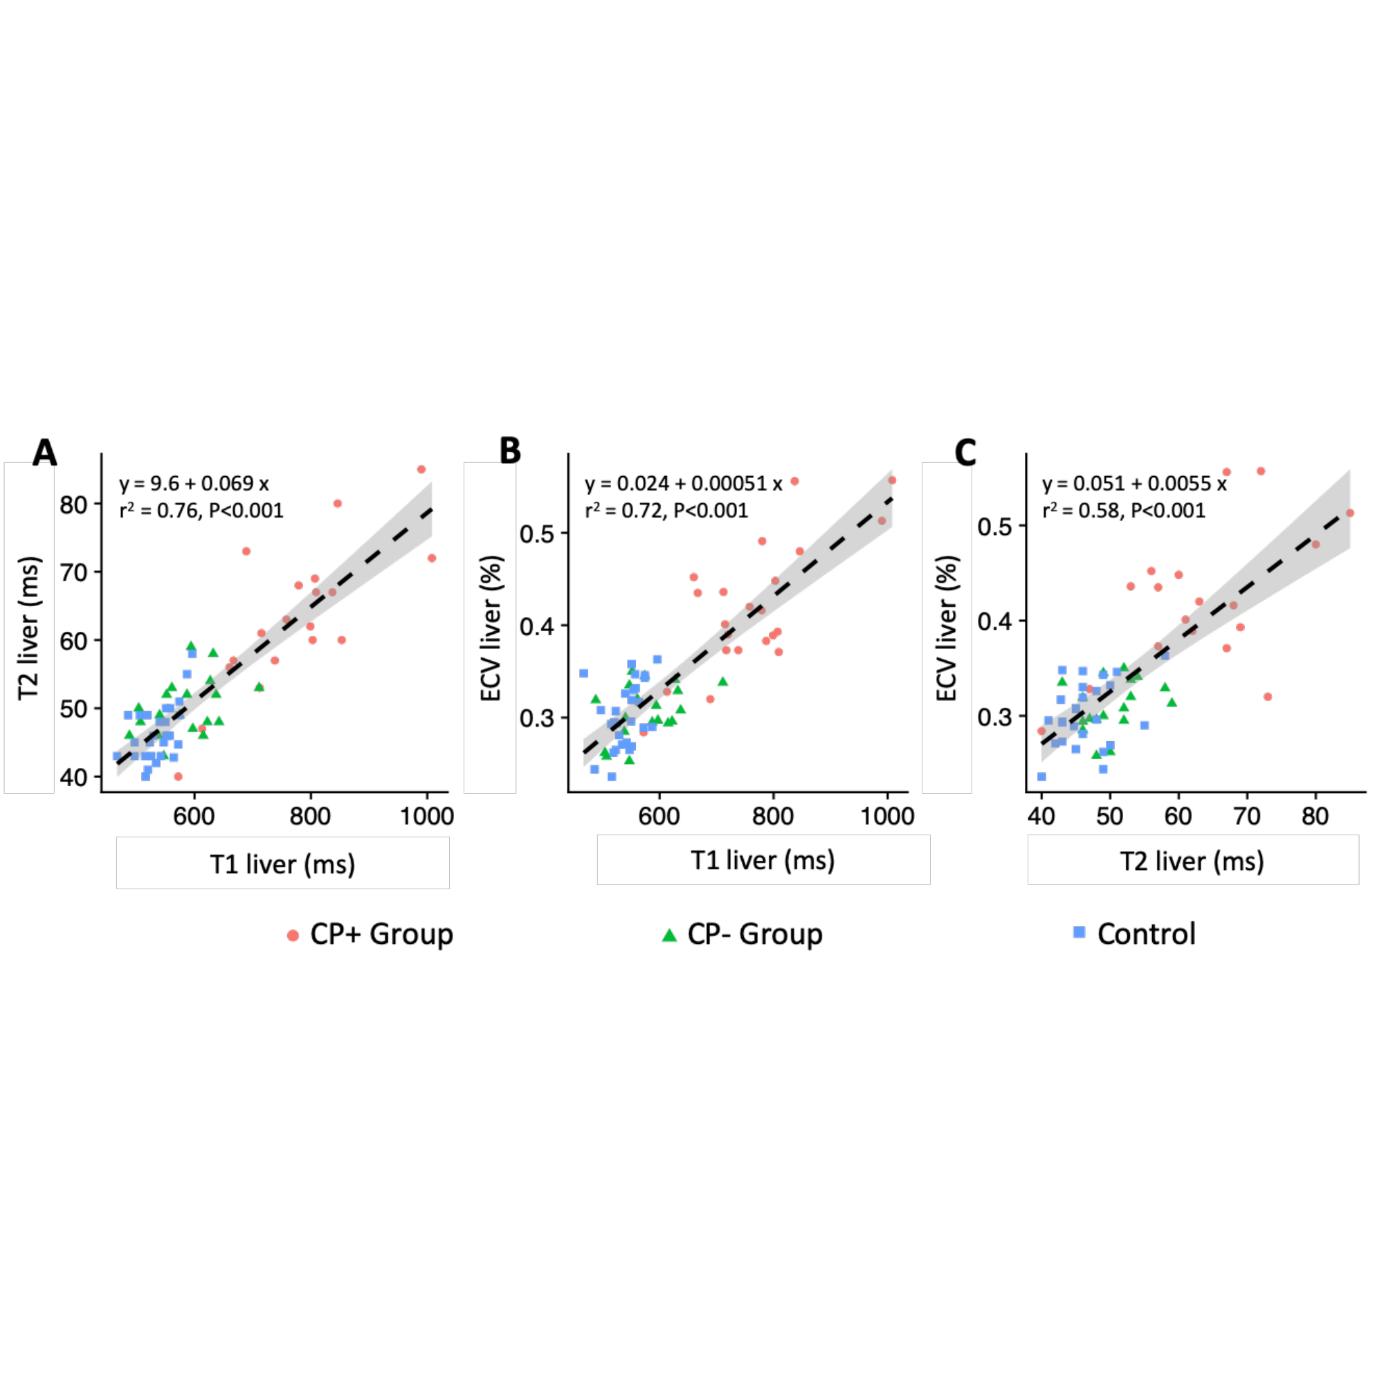


**Supplementary Figure 2**

Correlation between T1, T2 and ECV values of the liver parenchyma and GGT values


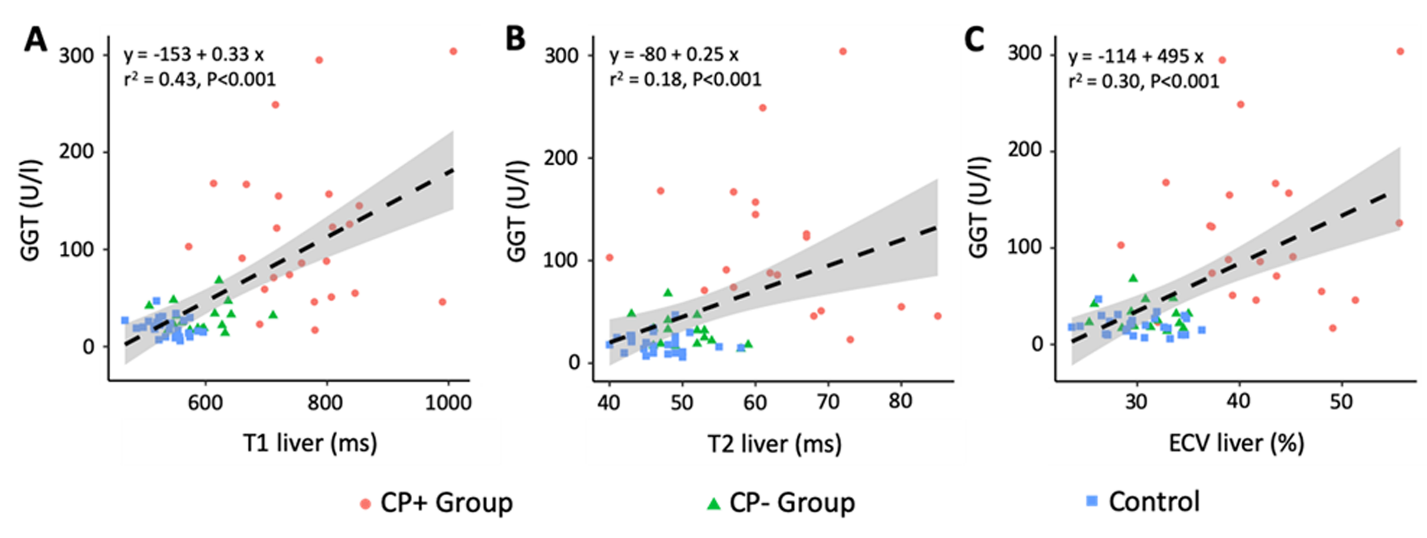

Supplement: Supplementary file 1 [file 4ad29508167887b13afc8de0.docx]
